# Supplementary material for: The gut microbiome correlates with conspecific aggression in a small population of rescued dogs (Canis familiaris)
Source: PubMed Central journal article supplement (PMC6330041; doi:10.7717/peerj.6103), 2019-01-09

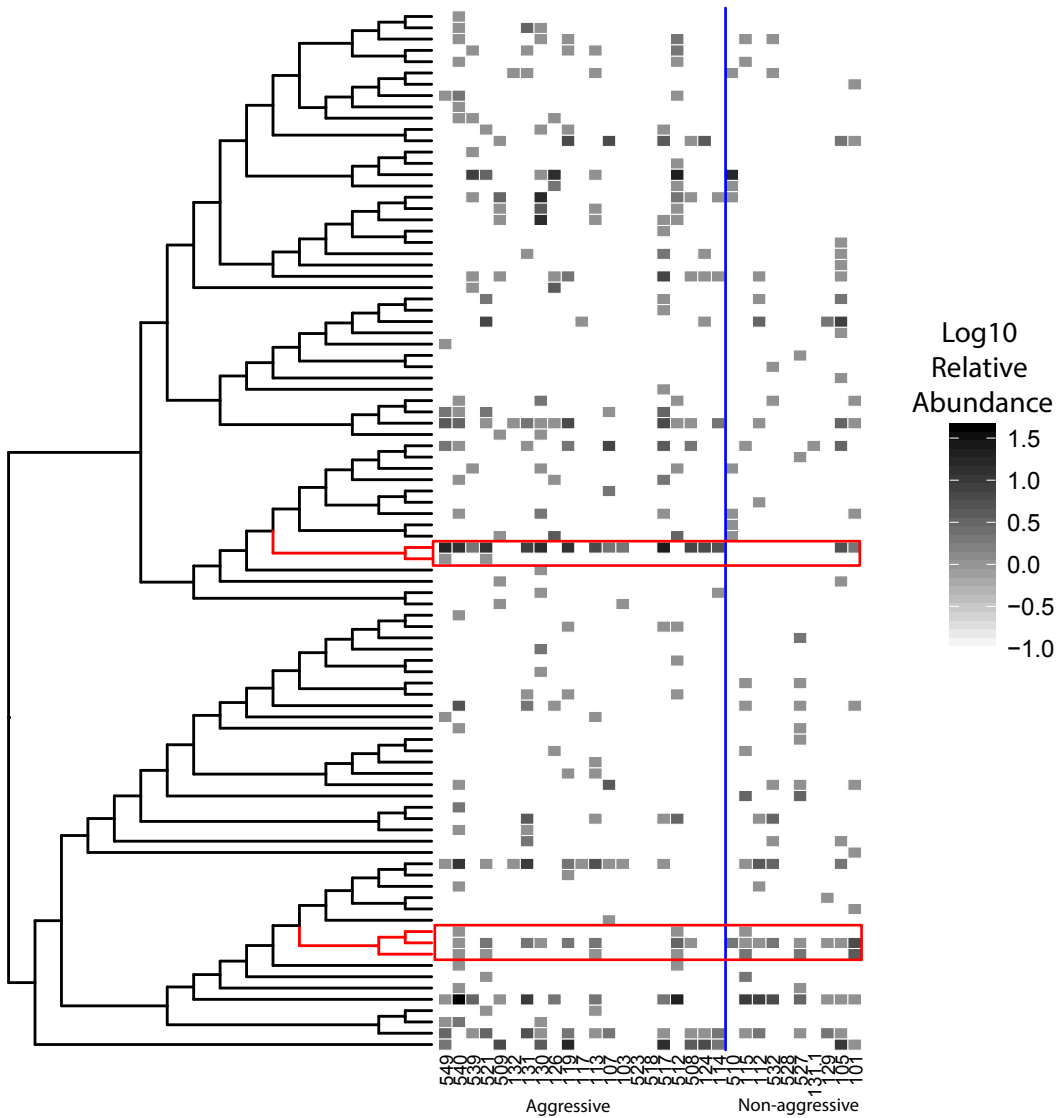

Supplement: peerj-07-6103-s007.pdf [file peerj-07-6103-s007.pdf]
